# Supplementary material for: Comparison of Nine Statistical Model Based Warfarin Pharmacogenetic Dosing Algorithms Using the Racially Diverse International Warfarin Pharmacogenetic Consortium Cohort Database
Source: PubMed Central journal article supplement (PMC4549222; doi:10.1371/journal.pone.0135784), 2015-08-25
Supplement: pone.0135784.s001.pdf [file pone.0135784.s001.pdf]

**Table A Statistical significance between ideal rate of all algorithms in validation cohort (n=960)**

| <b>Algorithms</b> | <b>ANN</b>             | <b>RT</b>              | <b>MLR</b>             | <b>RFR</b>             | <b>BRT</b>             | <b>MARS</b>            | <b>LAR</b>             | <b>BART</b>            |
|-------------------|------------------------|------------------------|------------------------|------------------------|------------------------|------------------------|------------------------|------------------------|
| <b>SVR</b>        | $3.52 \times 10^{-23}$ | $1.93 \times 10^{-29}$ | $4.87 \times 10^{-19}$ | $1.09 \times 10^{-2}$  | $1.45 \times 10^{-1}$  | $1.70 \times 10^{-2}$  | $7.82 \times 10^{-19}$ | $4.81 \times 10^{-1}$  |
| <b>ANN</b>        |                        | $8.99 \times 10^{-6}$  | $4.98 \times 10^{-11}$ | $1.46 \times 10^{-19}$ | $4.93 \times 10^{-21}$ | $2.68 \times 10^{-26}$ | $6.76 \times 10^{-11}$ | $5.04 \times 10^{-24}$ |
| <b>RT</b>         |                        |                        | $1.06 \times 10^{-5}$  | $6.11 \times 10^{-21}$ | $8.41 \times 10^{-24}$ | $3.71 \times 10^{-37}$ | $1.84 \times 10^{-5}$  | $8.00 \times 10^{-30}$ |
| <b>MLR</b>        |                        |                        |                        | $7.13 \times 10^{-11}$ | $1.37 \times 10^{-13}$ | $2.14 \times 10^{-27}$ | $9.38 \times 10^{-1}$  | $1.26 \times 10^{-19}$ |
| <b>RFR</b>        |                        |                        |                        |                        | $2.93 \times 10^{-1}$  | $1.54 \times 10^{-6}$  | $8.10 \times 10^{-11}$ | $1.93 \times 10^{-3}$  |
| <b>BRT</b>        |                        |                        |                        |                        |                        | $1.90 \times 10^{-4}$  | $1.68 \times 10^{-13}$ | $3.87 \times 10^{-2}$  |
| <b>MARS</b>       |                        |                        |                        |                        |                        |                        | $5.10 \times 10^{-27}$ | $1.19 \times 10^{-1}$  |
| <b>LAR</b>        |                        |                        |                        |                        |                        |                        |                        | $1.84 \times 10^{-19}$ |

Data are presented as the p-values of two independent samples t-test between the predicted ideal rates of all algorithms.

MLR: multiple linear regression; SVR: support vector regression; ANN: artificial neural network; RT: regression tree; RFR: random forest regression; BRT: boosted regression tree; MARS: multivariate adaptive regression splines; LAR: lasoo regression; BART: Bayesian additive regression trees.

**Table B Statistical significance between ideal rate of all algorithms in the White validation cohort (n=544)**

| <b>Algorithms</b> | <b>ANN</b>             | <b>RT</b>              | <b>MLR</b>             | <b>RFR</b>             | <b>BRT</b>             | <b>MARS</b>            | <b>LAR</b>             | <b>BART</b>            |
|-------------------|------------------------|------------------------|------------------------|------------------------|------------------------|------------------------|------------------------|------------------------|
| <b>SVR</b>        | $1.65 \times 10^{-18}$ | $1.07 \times 10^{-36}$ | $6.68 \times 10^{-14}$ | $1.69 \times 10^{-4}$  | $1.41 \times 10^{-11}$ | $3.27 \times 10^{-6}$  | $1.07 \times 10^{-14}$ | $9.75 \times 10^{-5}$  |
| <b>ANN</b>        |                        | $3.66 \times 10^{-1}$  | $3.96 \times 10^{-7}$  | $3.35 \times 10^{-13}$ | $2.25 \times 10^{-16}$ | $2.85 \times 10^{-25}$ | $1.16 \times 10^{-6}$  | $3.11 \times 10^{-24}$ |
| <b>RT</b>         |                        |                        | $1.04 \times 10^{-11}$ | $1.29 \times 10^{-25}$ | $4.78 \times 10^{-32}$ | $2.20 \times 10^{-50}$ | $1.20 \times 10^{-10}$ | $9.33 \times 10^{-47}$ |
| <b>MLR</b>        |                        |                        |                        | $1.35 \times 10^{-5}$  | $3.41 \times 10^{-10}$ | $3.63 \times 10^{-27}$ | $7.20 \times 10^{-1}$  | $4.30 \times 10^{-24}$ |
| <b>RFR</b>        |                        |                        |                        |                        | $2.13 \times 10^{-2}$  | $1.66 \times 10^{-15}$ | $3.17 \times 10^{-6}$  | $6.77 \times 10^{-13}$ |
| <b>BRT</b>        |                        |                        |                        |                        |                        | $2.69 \times 10^{-9}$  | $6.03 \times 10^{-11}$ | $2.16 \times 10^{-7}$  |
| <b>MARS</b>       |                        |                        |                        |                        |                        |                        | $6.60 \times 10^{-28}$ | $5.34 \times 10^{-1}$  |
| <b>LAR</b>        |                        |                        |                        |                        |                        |                        |                        | $7.25 \times 10^{-25}$ |

Data are presented as the p-values of two independent samples t-test between the predicted ideal rates of all algorithms.

MLR: multiple linear regression; SVR: support vector regression; ANN: artificial neural network; RT: regression tree; RFR: random forest regression; BRT: boosted regression tree; MARS: multivariate adaptive regression splines; LAR: lasoo regression; BART: Bayesian additive regression trees.

**Table C Statistical significance between ideal rate of all algorithms in the Asian validation cohort (n=231)**

| <b>Algorithms</b> | <b>ANN</b>            | <b>RT</b>              | <b>MLR</b>             | <b>RFR</b>            | <b>BRT</b>             | <b>MARS</b>            | <b>LAR</b>             | <b>BART</b>            |
|-------------------|-----------------------|------------------------|------------------------|-----------------------|------------------------|------------------------|------------------------|------------------------|
| <b>SVR</b>        | $1.21 \times 10^{-9}$ | $2.34 \times 10^{-16}$ | $5.29 \times 10^{-1}$  | $3.23 \times 10^{-3}$ | $6.89 \times 10^{-3}$  | $7.57 \times 10^{-1}$  | $4.30 \times 10^{-1}$  | $4.56 \times 10^{-1}$  |
| <b>ANN</b>        |                       | $3.91 \times 10^{-1}$  | $1.46 \times 10^{-8}$  | $6.25 \times 10^{-5}$ | $1.88 \times 10^{-5}$  | $3.60 \times 10^{-10}$ | $3.08 \times 10^{-8}$  | $3.61 \times 10^{-11}$ |
| <b>RT</b>         |                       |                        | $1.03 \times 10^{-14}$ | $6.15 \times 10^{-9}$ | $6.47 \times 10^{-10}$ | $4.11 \times 10^{-17}$ | $3.66 \times 10^{-14}$ | $6.77 \times 10^{-19}$ |
| <b>MLR</b>        |                       |                        |                        | $1.94 \times 10^{-2}$ | $3.78 \times 10^{-2}$  | $3.49 \times 10^{-1}$  | $8.70 \times 10^{-1}$  | $1.64 \times 10^{-1}$  |
| <b>RFR</b>        |                       |                        |                        |                       | $7.51 \times 10^{-1}$  | $1.23 \times 10^{-3}$  | $3.06 \times 10^{-2}$  | $1.92 \times 10^{-4}$  |
| <b>BRT</b>        |                       |                        |                        |                       |                        | $2.72 \times 10^{-3}$  | $5.77 \times 10^{-2}$  | $4.55 \times 10^{-4}$  |
| <b>MARS</b>       |                       |                        |                        |                       |                        |                        | $2.75 \times 10^{-1}$  | $6.71 \times 10^{-1}$  |
| <b>LAR</b>        |                       |                        |                        |                       |                        |                        |                        | $1.22 \times 10^{-1}$  |

Data are presented as the p-values of two independent samples t-test between the predicted ideal rates of all algorithms.

MLR: multiple linear regression; SVR: support vector regression; ANN: artificial neural network; RT: regression tree; RFR: random forest regression; BRT: boosted regression tree; MARS: multivariate adaptive regression splines; LAR: lasoo regression; BART: Bayesian additive regression trees.

**Table D Statistical significance between ideal rate of all algorithms in the Black validation cohort (n=133)**

| <b>Algorithms</b> | <b>ANN</b>            | <b>RT</b>              | <b>MLR</b>             | <b>RFR</b>             | <b>BRT</b>             | <b>MARS</b>            | <b>LAR</b>             | <b>BART</b>            |
|-------------------|-----------------------|------------------------|------------------------|------------------------|------------------------|------------------------|------------------------|------------------------|
| <b>SVR</b>        | $4.15 \times 10^{-4}$ | $7.45 \times 10^{-16}$ | $3.76 \times 10^{-2}$  | $2.18 \times 10^{-1}$  | $9.33 \times 10^{-1}$  | $9.15 \times 10^{-1}$  | $2.73 \times 10^{-2}$  | $3.79 \times 10^{-1}$  |
| <b>ANN</b>        |                       | $2.84 \times 10^{-5}$  | $1.96 \times 10^{-7}$  | $1.56 \times 10^{-2}$  | $9.83 \times 10^{-4}$  | $4.96 \times 10^{-4}$  | $1.10 \times 10^{-7}$  | $5.31 \times 10^{-3}$  |
| <b>RT</b>         |                       |                        | $1.36 \times 10^{-21}$ | $3.82 \times 10^{-12}$ | $2.59 \times 10^{-14}$ | $6.78 \times 10^{-16}$ | $5.01 \times 10^{-22}$ | $1.67 \times 10^{-13}$ |
| <b>MLR</b>        |                       |                        |                        | $1.26 \times 10^{-3}$  | $4.27 \times 10^{-2}$  | $2.65 \times 10^{-2}$  | $9.02 \times 10^{-1}$  | $3.38 \times 10^{-3}$  |
| <b>RFR</b>        |                       |                        |                        |                        | $2.82 \times 10^{-1}$  | $2.51 \times 10^{-1}$  | $8.10 \times 10^{-4}$  | $7.07 \times 10^{-1}$  |
| <b>BRT</b>        |                       |                        |                        |                        |                        | $9.89 \times 10^{-1}$  | $3.19 \times 10^{-2}$  | $4.60 \times 10^{-1}$  |
| <b>MARS</b>       |                       |                        |                        |                        |                        |                        | $1.88 \times 10^{-2}$  | $4.31 \times 10^{-1}$  |
| <b>LAR</b>        |                       |                        |                        |                        |                        |                        |                        | $2.22 \times 10^{-3}$  |

Data are presented as the p-values of two independent samples t-test between the predicted ideal rates of all algorithms.

MLR: multiple linear regression; SVR: support vector regression; ANN: artificial neural network; RT: regression tree; RFR: random forest regression; BRT: boosted regression tree; MARS: multivariate adaptive regression splines; LAR: lasoo regression; BART: Bayesian additive regression trees.

**Table E Statistical significance between ideal rate of all algorithms in validation cohort (Intermediate-dose group)**

| <b>Algorithms</b> | <b>ANN</b>             | <b>RT</b>             | <b>MLR</b>             | <b>RFR</b>             | <b>BRT</b>             | <b>MARS</b>            | <b>LAR</b>             | <b>BART</b>            |
|-------------------|------------------------|-----------------------|------------------------|------------------------|------------------------|------------------------|------------------------|------------------------|
| <b>SVR</b>        | $8.66 \times 10^{-11}$ | $6.58 \times 10^{-9}$ | $6.01 \times 10^{-10}$ | $6.49 \times 10^{-5}$  | $3.02 \times 10^{-14}$ | $2.86 \times 10^{-7}$  | $1.76 \times 10^{-11}$ | $6.24 \times 10^{-1}$  |
| <b>ANN</b>        |                        | $8.49 \times 10^{-6}$ | $3.95 \times 10^{-16}$ | $2.56 \times 10^{-14}$ | $5.01 \times 10^{-18}$ | $3.57 \times 10^{-15}$ | $1.15 \times 10^{-16}$ | $3.72 \times 10^{-11}$ |
| <b>RT</b>         |                        |                       | $1.25 \times 10^{-26}$ | $6.19 \times 10^{-19}$ | $1.34 \times 10^{-30}$ | $3.13 \times 10^{-23}$ | $2.42 \times 10^{-28}$ | $1.73 \times 10^{-9}$  |
| <b>MLR</b>        |                        |                       |                        | $4.04 \times 10^{-2}$  | $1.84 \times 10^{-2}$  | $2.14 \times 10^{-1}$  | $4.75 \times 10^{-1}$  | $4.74 \times 10^{-8}$  |
| <b>RFR</b>        |                        |                       |                        |                        | $6.26 \times 10^{-5}$  | $3.63 \times 10^{-1}$  | $7.46 \times 10^{-2}$  | $7.27 \times 10^{-4}$  |
| <b>BRT</b>        |                        |                       |                        |                        |                        | $6.00 \times 10^{-4}$  | $8.69 \times 10^{-2}$  | $4.07 \times 10^{-12}$ |
| <b>MARS</b>       |                        |                       |                        |                        |                        |                        | $5.27 \times 10^{-2}$  | $9.35 \times 10^{-6}$  |
| <b>LAR</b>        |                        |                       |                        |                        |                        |                        |                        | $2.09 \times 10^{-9}$  |

Data are presented as the p-values of two independent samples t-test between the predicted ideal rates of all algorithms.

MLR: multiple linear regression; SVR: support vector regression; ANN: artificial neural network; RT: regression tree; RFR: random forest regression; BRT: boosted regression tree; MARS: multivariate adaptive regression splines; LAR: lasoo regression; BART: Bayesian additive regression trees.

**Table F Statistical significance between ideal rate of all algorithms in validation cohort (low-dose group)**

| <b>Algorithms</b> | <b>ANN</b>            | <b>RT</b>              | <b>MLR</b>             | <b>RFR</b>             | <b>BRT</b>             | <b>MARS</b>            | <b>LAR</b>             | <b>BART</b>            |
|-------------------|-----------------------|------------------------|------------------------|------------------------|------------------------|------------------------|------------------------|------------------------|
| <b>SVR</b>        | $1.84 \times 10^{-1}$ | $7.86 \times 10^{-27}$ | $1.50 \times 10^{-51}$ | $2.94 \times 10^{-24}$ | $1.06 \times 10^{-30}$ | $1.95 \times 10^{-10}$ | $2.16 \times 10^{-53}$ | $2.18 \times 10^{-4}$  |
| <b>ANN</b>        |                       | $1.16 \times 10^{-3}$  | $4.42 \times 10^{-6}$  | $3.21 \times 10^{-2}$  | $1.76 \times 10^{-3}$  | $3.80 \times 10^{-1}$  | $2.02 \times 10^{-6}$  | $9.06 \times 10^{-1}$  |
| <b>RT</b>         |                       |                        | $1.28 \times 10^{-4}$  | $8.95 \times 10^{-4}$  | $6.58 \times 10^{-1}$  | $1.00 \times 10^{-9}$  | $1.62 \times 10^{-5}$  | $9.49 \times 10^{-17}$ |
| <b>MLR</b>        |                       |                        |                        | $3.40 \times 10^{-17}$ | $1.28 \times 10^{-6}$  | $4.49 \times 10^{-26}$ | $5.09 \times 10^{-1}$  | $6.98 \times 10^{-37}$ |
| <b>RFR</b>        |                       |                        |                        |                        | $1.17 \times 10^{-3}$  | $1.03 \times 10^{-4}$  | $4.17 \times 10^{-19}$ | $9.11 \times 10^{-12}$ |
| <b>BRT</b>        |                       |                        |                        |                        |                        | $2.48 \times 10^{-10}$ | $7.58 \times 10^{-8}$  | $1.51 \times 10^{-18}$ |
| <b>MARS</b>       |                       |                        |                        |                        |                        |                        | $7.26 \times 10^{-28}$ | $3.87 \times 10^{-3}$  |
| <b>LAR</b>        |                       |                        |                        |                        |                        |                        |                        | $1.01 \times 10^{-38}$ |

Data are presented as the p-values of two independent samples t-test between the predicted ideal rates of all algorithms.

MLR: multiple linear regression; SVR: support vector regression; ANN: artificial neural network; RT: regression tree; RFR: random forest regression; BRT: boosted regression tree; MARS: multivariate adaptive regression splines; LAR: lasoo regression; BART: Bayesian additive regression trees.

**Table G Statistical significance between ideal rate of all algorithms in validation cohort (high-dose group)**

| <b>Algorithms</b> | <b>ANN</b>            | <b>RT</b>             | <b>MLR</b>             | <b>RFR</b>             | <b>BRT</b>             | <b>MARS</b>            | <b>LAR</b>             | <b>BART</b>            |
|-------------------|-----------------------|-----------------------|------------------------|------------------------|------------------------|------------------------|------------------------|------------------------|
| <b>SVR</b>        | $4.51 \times 10^{-4}$ | $2.48 \times 10^{-6}$ | $4.20 \times 10^{-26}$ | $4.42 \times 10^{-2}$  | $1.32 \times 10^{-3}$  | $2.36 \times 10^{-3}$  | $1.67 \times 10^{-27}$ | $6.08 \times 10^{-5}$  |
| <b>ANN</b>        |                       | $3.10 \times 10^{-2}$ | $6.85 \times 10^{-1}$  | $3.07 \times 10^{-3}$  | $8.47 \times 10^{-2}$  | $1.94 \times 10^{-5}$  | $8.10 \times 10^{-1}$  | $6.58 \times 10^{-6}$  |
| <b>RT</b>         |                       |                       | $1.13 \times 10^{-9}$  | $6.13 \times 10^{-2}$  | $1.05 \times 10^{-1}$  | $4.52 \times 10^{-13}$ | $6.89 \times 10^{-11}$ | $8.85 \times 10^{-16}$ |
| <b>MLR</b>        |                       |                       |                        | $3.60 \times 10^{-18}$ | $9.11 \times 10^{-15}$ | $4.25 \times 10^{-36}$ | $5.11 \times 10^{-1}$  | $5.48 \times 10^{-40}$ |
| <b>RFR</b>        |                       |                       |                        |                        | $2.41 \times 10^{-1}$  | $1.32 \times 10^{-6}$  | $1.49 \times 10^{-19}$ | $9.88 \times 10^{-9}$  |
| <b>BRT</b>        |                       |                       |                        |                        |                        | $2.60 \times 10^{-9}$  | $3.99 \times 10^{-16}$ | $8.74 \times 10^{-12}$ |
| <b>MARS</b>       |                       |                       |                        |                        |                        |                        | $2.20 \times 10^{-37}$ | $3.30 \times 10^{-1}$  |
| <b>LAR</b>        |                       |                       |                        |                        |                        |                        |                        | $3.30 \times 10^{-41}$ |

Data are presented as the p-values of two independent samples t-test between the predicted ideal rates of all algorithms.

MLR: multiple linear regression; SVR: support vector regression; ANN: artificial neural network; RT: regression tree; RFR: random forest regression; BRT: boosted regression tree; MARS: multivariate adaptive regression splines; LAR: lasoo regression; BART: Bayesian additive regression trees.
